# Supplementary material for: Distinguishing the sources of silica nanoparticles by dual isotopic fingerprinting and machine learning
Source: PubMed Central journal article supplement (PMC6453897; doi:10.1038/s41467-019-09629-5), 2019-04-08
Supplement: 41467_2019_9629_MOESM1_ESM.pdf [file 41467_2019_9629_MOESM1_ESM.pdf]

1  
2  
3  
4  
5  
6  
7  
8  
9  
10  
11  
12  
13  
14

SUPPLEMENTARY INFORMATION

for

**Distinguishing the sources of silica nanoparticles by dual isotopic  
fingerprinting and machine learning**

Yang et al.

**Content**

- 1. Supplementary Methods
- 2. Supplementary Discussion
- 3. Supplementary Tables
- 4. Supplementary Figures
- 5. Supplementary References

## 15 **1. Supplementary Methods**

### 16 *1.1 Chemicals and Reagents*

17 The Si and O isotope standard NIST SRM-8546 was purchased from the National Institute  
18 of Standards and Technology (Gaithersburg, MD). The secondary Si isotope standard IRMM-  
19 017 was bought from the Institute for Reference Materials and Measurements (GEEL, Belgium).  
20 The element calibration standard solution was bought from Agilent (Santa Clara, CA). Nitric  
21 acid (65%) was bought from Merck (Darmstadt, Germany). Hydrochloric acid (37.5%, MOS)  
22 was purchased from Beijing Chemicals Works (Beijing, China). Sodium hydroxide and  
23 Hydrogen peroxide were purchased from Sinopharm Chemical Reagent Co. (Beijing, China).  
24 Ultrapure water (18.3 MΩ·cm) used throughout the experiments was produced from a Milli-Q  
25 Gradient system (Millipore, Bedford).

### 26 *1.2 Collection of real consumer products*

27 Four types of toothpaste (TP) samples, three types of inorganic filter membrane (IFM)  
28 samples, and one nanoquartz coating (NQC) sample were purchased from different  
29 manufacturers or suppliers. The detailed information about the manufacturers or suppliers is  
30 given in Supplementary Table 1 and 2.

### 31 *1.3 Extraction of SiO<sub>2</sub> NPs from real products*

32 To extract SiO<sub>2</sub> particles from real samples, 0.2 g of samples was introduced into a Teflon  
33 digestion vessel containing concentrated HNO<sub>3</sub> (4.0 mL) and H<sub>2</sub>O<sub>2</sub> (4.0 mL). Then, the vessel  
34 was sealed and digested in a microwave system. The mixture was irradiated at 150 °C (800 W)  
35 for 10 min followed by 180 °C (1600 W) for 20 min. After cooling, the mixture was transferred  
36 to a 50 mL centrifuge tube and washed with ultrapure water for three times. Finally, the residues  
37 were heated at 100 °C to dryness. The purity of the extracts was checked by using XRF and  
38 ICP-MS.

### 39 *1.4 Construction of pseudo-samples used in the model study*

40 In order to obtain an unbiased classifier, balanced data samples for the three to five classes  
41 of sources should be ensured for the machine learning procedure. Therefore, a randomly

42 sampling procedure was conducted to generate pseudo-samples for two classes (ND and NQ)  
43 with limited experimental data from the literature data. For each class, the  $\delta^{30}\text{Si}$  and  $\delta^{18}\text{O}$  values  
44 of pseudo-samples were randomly drawn from the literature reported data<sup>1-12</sup> that followed a  
45 normal distribution ( $1.41 \pm 0.26\text{‰}$  and  $31.99 \pm 5.45\text{‰}$  for  $\delta^{30}\text{Si}$  and  $\delta^{18}\text{O}$  of ND, respectively;  
46  $-0.26 \pm 0.42\text{‰}$  and  $10.62 \pm 0.66\text{‰}$  for  $\delta^{30}\text{Si}$  and  $\delta^{18}\text{O}$  of NQ, respectively). The combination of  
47 the experimental data with the literature data can also enhance the representiveness of the data.  
48 The sampled data listed in the Supplementary Table 3-5 are labeled by asterisks.  
49

## 50 **2. Supplementary Discussion**

### 51 *2.1 Explanation for the wide $\delta^{30}\text{Si}$ range of EF*

52 The EF showed a much wider  $\delta^{30}\text{Si}$  range than ES and EP (Fig. 2a). This phenomenon  
53 might be related to the large isotopic enrichment factor and highly uncertain relative fraction  
54 reacted during the flame pyrolysis of  $\text{SiCl}_4$  (reaction **10** in Fig. 3). The wide  $\delta^{30}\text{Si}$  range of EF  
55 produced from the same precursor ( $\text{SiCl}_4$ ) also suggested that the reaction **10** was the key step  
56 to cause a large Si isotope variation in EF. The lower boundary of  $\delta^{30}\text{Si}$  range of EF (-5.74‰)  
57 approached to the most negative  $\delta^{30}\text{Si}$  value ever found in the terrestrial system<sup>3</sup>, suggesting  
58 that the reaction **10** had a large isotopic enrichment factor. Furthermore, in a kinetically  
59 controlled system with negligible backward reaction, the degree of isotope fractionation is  
60 dependent on the relative fraction reacted<sup>13</sup>. We note that the wide  $\delta^{30}\text{Si}$  range of EF was not  
61 only caused by the variation among different manufacturers. As shown in Fig. 4c-d, even in EF  
62 products from the same manufacturer, the  $\delta^{30}\text{Si}$  also showed large variations. The possible  
63 reason is that the flame pyrolysis of  $\text{SiCl}_4$  is a violent reaction and the reaction yield is rather  
64 unstable. The products obtained at different yields may have different isotopic fingerprints due  
65 to the different relative fractions reacted. In addition, the unreacted reactants may also have  
66 different isotopic fingerprints, and they are normally reused in the industrial production, which  
67 may obliterate the Si isotope fractionation in the end product and bring in more uncertainties to  
68 the isotopic fingerprints of products.

### 69 *2.2 Isotope fractionation during the EP production in different manufacturers*

70 We have investigated the Si and O isotope fractionation during the manufacturing process  
71 of precipitated  $\text{SiO}_2$  NPs (EP). The Si and O isotopic compositions of EP and its raw material  
72 NQ from three different manufacturers were analyzed (Supplementary Fig. 8). For O isotope,  
73 all product EPs were enriched in  $^{18}\text{O}$  relative to the raw materials, probably due to the  
74 introduction of external  $^{18}\text{O}$ -enriched sources (e.g., NaOH) during the manufacturing process  
75 (see Supplementary Table 8, reaction **5**). It should be noted that the industrial synthetic routes  
76 to NaOH are rather complex, which may cause the O isotopic composition of industrial NaOH  
77 highly uncertain. This could explain why the EP showed a relatively wide  $\delta^{18}\text{O}$  range. For Si

78 isotope, the variations in  $\delta^{30}\text{Si}$  of EP were not as large as those of EF (Fig. 2a), suggesting that  
79 the precipitation method did not cause large Si isotope fractionation. Specifically, the  
80 manufacturing process in different manufacturers caused different degrees of Si isotope  
81 fractionation, suggesting that the Si isotope fractionation was also affected by the  
82 manufacturing conditions. For EP from THSL, no significant Si isotope fractionation between  
83 products and raw materials was observed. For EP from WFSJ, the Si in products was enriched  
84 in light isotope, while that from SGCT were slightly enriched in heavy isotope. The explanation  
85 for these phenomena was not very clear yet, while the different Si isotope fractionation degree  
86 may provide another manner to distinguish the manufacturers of EP.

87

88 **3. Supplementary Tables**89 **Supplementary Table 1.** Sample information, Si and O isotopic compositions, and O/Si ratios ( $R_{O/Si}$ ) of all samples used in this study.

| No. | Sample <sup>a</sup> | Type                | Model/Information    | $\delta^{29}\text{Si}$ (‰) | SD   | $\delta^{30}\text{Si}$ (‰) | SD   | $n$ | $\delta^{18}\text{O}$ (‰) | SD   | $n$ | $R_{O/Si}$ | SD   | $n$ |
|-----|---------------------|---------------------|----------------------|----------------------------|------|----------------------------|------|-----|---------------------------|------|-----|------------|------|-----|
| 1   | WFSJ-P1             | Precipitated silica | 650 nm, hydrophilic  | -0.36                      | 0.08 | -0.72                      | 0.06 | 2   | 19.0                      | 0.05 | 5   | 2.19       | 0.64 | 5   |
| 2   | WFSJ-P2             | Precipitated silica | 650 nm, hydrophobic  | -0.53                      | 0.05 | -1.02                      | 0.14 | 3   | 18.7                      | 0.05 | 5   | 3.27       | 0.57 | 6   |
| 3   | WFSJ-P3             | Precipitated silica | 2500 nm, hydrophilic | -0.54                      | 0.03 | -0.96                      | 0.05 | 2   | 21.4                      | 0.01 | 5   | 2.86       | 0.31 | 6   |
| 4   | WFSJ-Q              | Quartz              | -                    | -0.04                      | 0.12 | -0.30                      | 0.01 | 2   | 11.8                      | 0.03 | 5   | -          | -    | -   |
| 5   | TCTS-P              | Precipitated silica | SP1, 20 nm           | -0.18                      | 0.05 | -0.25                      | 0.03 | 2   | 25.9                      | 0.02 | 5   | 2.95       | 0.33 | 7   |
| 6   | BJDK-P1             | Precipitated silica | 30 nm                | -0.19                      | 0.05 | -0.28                      | 0.09 | 3   | 20.3                      | 0.06 | 5   | 2.90       | 0.13 | 6   |
| 7   | BJDK-P2             | Precipitated silica | 100 nm               | -0.45                      | 0.10 | -0.75                      | 0.10 | 2   | 20.0                      | 0.04 | 5   | 2.03       | 0.35 | 6   |
| 8   | BJDK-P3             | Precipitated silica | 500 nm               | -0.45                      | 0.02 | -0.75                      | 0.08 | 3   | 18.2                      | 0.04 | 5   | 2.09       | 0.45 | 7   |
| 9   | XCJR-P1             | Precipitated silica | VK-SP15, 15 nm       | -0.42                      | 0.04 | -0.73                      | 0.10 | 3   | 18.9                      | 0.04 | 5   | 2.76       | 0.43 | 7   |
| 10  | XCJR-P2             | Precipitated silica | VK-SP20, 20 nm       | -0.32                      | 0.03 | -0.64                      | 0.13 | 3   | 18.7                      | 0.02 | 5   | 2.53       | 0.50 | 5   |
| 11  | XCJR-P3             | Precipitated silica | VK-SP30, 30 nm       | -0.37                      | 0.01 | -0.69                      | 0.09 | 3   | 18.6                      | 0.05 | 5   | 2.25       | 0.13 | 5   |
| 12  | XCJR-P4             | Precipitated silica | VK-SP50, 50 nm       | -0.41                      | 0.06 | -0.62                      | 0.01 | 2   | 21.0                      | 0.01 | 5   | 2.51       | 0.46 | 5   |
| 13  | SGCT-F1             | Fumed silica        | 20 nm, hydrophilic   | -2.78                      | 0.03 | -5.19                      | 0.17 | 3   | 21.4                      | 0.03 | 5   | 2.39       | 0.21 | 9   |
| 14  | SGCT-F2             | Fumed silica        | 20 nm, hydrophobic   | -1.41                      | 0.03 | -2.73                      | 0.11 | 3   | 22.1                      | 0.04 | 5   | 2.62       | 0.14 | 4   |
| 15  | SGCT-F3             | Fumed silica        | 40 nm, hydrophilic   | -3.04                      | 0.02 | -5.74                      | 0.12 | 3   | 21.6                      | 0.04 | 5   | 2.65       | 0.21 | 8   |
| 16  | SGCT-F4             | Fumed silica        | 40 nm, hydrophobic   | -1.55                      | 0.08 | -2.97                      | 0.14 | 3   | 22.4                      | 0.03 | 5   | 2.45       | 0.60 | 8   |
| 17  | SGCT-F5             | Fumed silica        | 50 nm, hydrophilic   | -1.26                      | 0.04 | -2.39                      | 0.10 | 3   | 22.3                      | 0.07 | 5   | 2.21       | 0.19 | 5   |
| 18  | SGCT-F6             | Fumed silica        | 100 nm, hydrophilic  | -1.39                      | 0.08 | -2.73                      | 0.16 | 3   | 17.3                      | 0.08 | 5   | 2.31       | 0.30 | 4   |
| 19  | SGCT-S1             | Sol-gel silica      | 1500 nm              | -0.21                      | 0.05 | -0.37                      | 0.15 | 3   | 16.9                      | 0.04 | 5   | 2.23       | 0.34 | 8   |
| 20  | SGCT-S2             | Sol-gel silica      | 2000 nm              | -0.18                      | 0.04 | -0.40                      | 0.09 | 3   | 18.4                      | 0.05 | 5   | 2.40       | 0.44 | 12  |
| 21  | SGCT-S3             | Sol-gel silica      | 3500 nm              | -0.30                      | 0.04 | -0.75                      | 0.14 | 3   | 18.9                      | 0.03 | 5   | 2.44       | 0.36 | 12  |
| 22  | SGCT-P1             | Precipitated silica | 120 nm               | -0.03                      | 0.03 | -0.17                      | 0.02 | 3   | 20.3                      | 0.03 | 5   | 2.28       | 0.31 | 8   |
| 23  | SGCT-P2             | Precipitated silica | 200 nm               | -0.10                      | 0.05 | -0.24                      | 0.14 | 3   | 20.5                      | 0.03 | 5   | 2.02       | 0.08 | 4   |

|    |            |                     |                                    |       |      |       |      |   |      |      |   |      |      |    |
|----|------------|---------------------|------------------------------------|-------|------|-------|------|---|------|------|---|------|------|----|
| 24 | SGCT-P3    | Precipitated silica | 325 nm                             | -0.12 | 0.05 | -0.12 | 0.17 | 3 | 20.8 | 0.05 | 5 | 2.08 | 0.18 | 4  |
| 25 | SGCT-P4    | Precipitated silica | 500 nm                             | -0.15 | 0.03 | -0.19 | 0.17 | 3 | 16.4 | 0.04 | 5 | 2.09 | 0.18 | 5  |
| 26 | SGCT-P5    | Precipitated silica | 1250 nm                            | -0.03 | 0.03 | -0.16 | 0.25 | 3 | 17.1 | 0.04 | 5 | 2.65 | 0.28 | 8  |
| 27 | SGCT-P6    | Precipitated silica | 1500 nm                            | 0     | 0.12 | -0.09 | 0.16 | 3 | 20.5 | 0.02 | 5 | 2.40 | 0.40 | 10 |
| 28 | SGCT-P7    | Precipitated silica | 2000 nm                            | -0.06 | 0.06 | -0.19 | 0.22 | 3 | 20.2 | 0.02 | 5 | 2.56 | 0.28 | 10 |
| 29 | SGCT-P8    | Precipitated silica | 2500 nm                            | -0.10 | 0.04 | -0.04 | 0.19 | 3 | 21.3 | 0.02 | 5 | 2.78 | 0.79 | 9  |
| 30 | SGCT-P9    | Precipitated silica | 3500 nm                            | -0.01 | 0.05 | 0.01  | 0.06 | 3 | 16.9 | 0.03 | 5 | 2.61 | 0.41 | 7  |
| 31 | SGCT-Q1    | Quartz              | -                                  | -0.27 | 0.03 | -0.58 | 0.14 | 3 | 12.6 | 0.05 | 5 | -    | -    | -  |
| 32 | SGCT-Q2    | Quartz              | -                                  | -0.15 | 0.04 | -0.54 | 0.08 | 3 | 11.6 | 0.06 | 5 | -    | -    | -  |
| 33 | SHMK-P     | Precipitated silica | 7631-86-9(CAS), 30 nm, hydrophobic | -0.24 | 0.05 | -0.49 | 0.09 | 3 | 18.1 | 0.06 | 5 | -    | -    | -  |
| 34 | THSL-P1    | Precipitated silica | TB-2, hydrophilic                  | -0.07 | 0.08 | -0.34 | 0.06 | 3 | 14.4 | 0.05 | 5 | -    | -    | -  |
| 35 | THSL-P2    | Precipitated silica | T20, 1500nm, hydrophilic           | -0.23 | 0.05 | -0.41 | 0.09 | 3 | 13.6 | 0.06 | 5 | -    | -    | -  |
| 36 | THSL-P3    | Precipitated silica | general                            | -0.14 | 0.00 | -0.25 | 0.07 | 3 | 14.7 | 0.05 | 5 | -    | -    | -  |
| 37 | THSL-P4    | Precipitated silica | hydrophobic                        | -0.14 | 0.07 | -0.38 | 0.08 | 3 | 16.1 | 0.07 | 5 | -    | -    | -  |
| 38 | THSL-P5    | Precipitated silica | T150, hydrophilic                  | -0.16 | 0.03 | -0.39 | 0.08 | 3 | 16.4 | 0.06 | 5 | -    | -    | -  |
| 39 | THSL-P6    | Precipitated silica | 36-5, hydrophilic                  | -0.18 | 0.06 | -0.53 | 0.03 | 3 | 14.7 | 0.05 | 5 | -    | -    | -  |
| 40 | THSL-Q     | Quartz              | -                                  | -0.12 | 0.06 | -0.31 | 0.09 | 3 | 11.4 | 0.04 | 5 | -    | -    | -  |
| 41 | Wacker-F1  | Fumed silica        | Germany, N20, hydrophilic          | -0.12 | 0.10 | -0.45 | 0.13 | 3 | 23.0 | 0.03 | 5 | 2.04 | 0.28 | 15 |
| 42 | Wacker-F2  | Fumed silica        | Germany, H18, hydrophobic          | -2.15 | 0.03 | -4.48 | 0.32 | 3 | 20.3 | 0.04 | 5 | 2.12 | 0.22 | 12 |
| 43 | Degussa-F1 | Fumed silica        | Germany, A200, 12 nm, hydrophilic  | -2.11 | 0.08 | -4.56 | 0.37 | 3 | 22.4 | 0.03 | 5 | 2.11 | 0.16 | 6  |
| 44 | Degussa-F2 | Fumed silica        | Germany, R812, hydrophobic         | -0.67 | 0.05 | -1.34 | 0.01 | 2 | 21.8 | 0.02 | 5 | 2.47 | 0.29 | 12 |
| 45 | Aladdin-P  | Precipitated silica | S104584                            | -0.09 | 0.07 | -0.12 | 0.07 | 3 | 19.5 | 0.07 | 5 | -    | -    | -  |

|    |                    |                           |                     |       |      |       |      |   |      |      |   |      |      |    |
|----|--------------------|---------------------------|---------------------|-------|------|-------|------|---|------|------|---|------|------|----|
| 46 | Aladdin-F1         | Fumed silica              | S104587             | -2.60 | 0.06 | -5.03 | 0.09 | 3 | 19.6 | 0.04 | 5 | -    | -    | -  |
| 47 | Aladdin-F2         | Fumed silica              | S104588             | -1.90 | 0.02 | -3.87 | 0.49 | 3 | 21.2 | 0.04 | 5 | -    | -    | -  |
| 48 | Aladdin-F3         | Fumed silica              | S104592             | -1.10 | 0.02 | -2.31 | 0.10 | 3 | 20.8 | 0.04 | 5 | -    | -    | -  |
| 49 | Aladdin-F4         | Fumed silica              | S104590             | -0.12 | 0.06 | -0.29 | 0.12 | 3 | 20.8 | 0.03 | 5 | -    | -    | -  |
| 50 | Aladdin-F5         | Fumed silica              | S104589             | -2.82 | 0.05 | -5.54 | 0.10 | 3 | 21.3 | 0.02 | 5 | -    | -    | -  |
| 51 | Aladdin-Q1         | Quartz                    | S140828             | 0.01  | 0.01 | -0.16 | 0.11 | 3 | 10.8 | 0.04 | 5 | -    | -    | -  |
| 52 | Aladdin-Q2         | Quartz                    | S104577             | -0.03 | 0.03 | -0.23 | 0.02 | 3 | 11.9 | 0.07 | 5 | -    | -    | -  |
| 53 | NCPS-S1            | Sol-gel silica            | 50 nm, hydrophilic  | -0.58 | 0.05 | -1.26 | 0.03 | 3 | 29.9 | 0.04 | 5 | -    | -    | -  |
| 54 | NCPS-S2            | Sol-gel silica            | 100 nm, hydrophilic | -0.60 | 0.03 | -0.95 | 0.07 | 3 | 23.0 | 0.03 | 5 | -    | -    | -  |
| 55 | NCPS-S3            | Sol-gel silica            | 200 nm, hydrophilic | -0.60 | 0.03 | -1.27 | 0.09 | 3 | 27.3 | 0.04 | 5 | -    | -    | -  |
| 56 | NCPS-S4            | Sol-gel silica            | 400 nm, hydrophilic | -0.60 | 0.08 | -0.97 | 0.05 | 3 | 22.0 | 0.04 | 5 | -    | -    | -  |
| 57 | TJKMO-Q            | Quartz                    | -                   | -0.17 | 0.05 | -0.33 | 0.05 | 3 | 9.8  | 0.02 | 5 | 2.08 | 0.20 | 11 |
| 58 | TJZY-Q             | Quartz                    | -                   | -0.04 | 0.01 | 0.08  | 0.06 | 3 | 12.3 | 0.03 | 5 | 2.15 | 0.53 | 11 |
| 59 | WXYT-Q             | Quartz                    | -                   | -0.01 | 0.01 | -0.13 | 0.03 | 3 | 9.8  | 0.02 | 5 | 2.00 | 0.27 | 6  |
| 60 | TJDM-Q             | Quartz                    | -                   | -0.14 | 0.07 | -0.27 | 0.08 | 3 | 12.1 | 0.03 | 5 | 2.21 | 0.40 | 9  |
| 61 | FYTF-Q             | Quartz                    | -                   | -0.14 | 0.04 | -0.10 | 0.21 | 3 | 12.3 | 0.02 | 5 | 1.42 | 0.56 | 6  |
| 62 | TJFC-D             | Diatomite                 | -                   | 0.06  | 0.01 | 0.36  | 0.14 | 3 | 24.0 | 0.03 | 5 | 2.06 | 0.65 | 10 |
| 63 | TJHX-D             | Diatomite                 | -                   | 0.15  | 0.01 | 0.29  | 0.05 | 3 | 22.7 | 0.03 | 5 | 1.71 | 0.36 | 5  |
| 64 | JLDH-D1            | Diatomite                 | -                   | 0.13  | 0.05 | 0.25  | 0.11 | 3 | 19.0 | 0.04 | 5 | -    | -    | -  |
| 65 | JLDH-D2            | Diatomite                 | -                   | 0.03  | 0.04 | 0.15  | 0.07 | 3 | 18.6 | 0.04 | 5 | -    | -    | -  |
| 66 | IFM-1 <sup>b</sup> | Inorganic filter membrane | -                   | -0.36 | 0.02 | -0.67 | 0.09 | 3 | 15.0 | 0.04 | 5 | -    | -    | -  |
| 67 | IFM-2 <sup>b</sup> | Inorganic filter membrane | -                   | -0.35 | 0.01 | -0.72 | 0.06 | 3 | 14.3 | 0.06 | 5 | -    | -    | -  |
| 68 | IFM-3 <sup>b</sup> | Inorganic filter membrane | -                   | -0.25 | 0.06 | -0.62 | 0.03 | 3 | 14.9 | 0.02 | 5 | -    | -    | -  |
| 69 | TP-1 <sup>b</sup>  | Toothpaste                | Liangmianzhen,      | 0.08  | 0.06 | -0.09 | 0.05 | 3 | 19.6 | 0.04 | 5 | -    | -    | -  |



|    |                   | Freshing particles |                          |       |      |       |      |   |      |      |   |   |   |   |
|----|-------------------|--------------------|--------------------------|-------|------|-------|------|---|------|------|---|---|---|---|
| 70 | TP-2 <sup>b</sup> | Toothpaste         | Aekyung, 2080            | -0.27 | 0.11 | -0.6  | 0.14 | 3 | 21.4 | 0.02 | 5 | - | - | - |
| 71 | TP-3 <sup>b</sup> | Toothpaste         | Pororo, for kids         | -0.11 | 0.13 | -0.34 | 0.02 | 3 | 22.6 | 0.04 | 5 | - | - | - |
| 72 | TP-4 <sup>b</sup> | Toothpaste         | Cellamiss, Dazzle series | -0.42 | 0.07 | -0.92 | 0.06 | 3 | 23.5 | 0.04 | 5 | - | - | - |
| 73 | NQC <sup>b</sup>  | Nanoquartz coating | MagicGem                 | -0.46 | 0.06 | -0.84 | 0.13 | 3 | 2.1  | 0.02 | 5 | - | - | - |

90 <sup>a</sup> The nomenclature of sample is “abbreviation of manufacturer + type + sample number”. The abbreviation of manufacturers are given in  
91 Supplementary Table 2. The type letter P, S, F, Q, and D denote precipitated silica, sol-gel silica, fumed silica, quartz, and diatomite, respectively.

92 <sup>b</sup> The #66-73 samples are real consumer products. IFM, TP, and NQC represent inorganic filter membrane, toothpaste, and nanoquartz coating.

93

94 **Supplementary Table 2.** Detailed information for manufacturers or suppliers of samples used in this study.

| No. | Abbreviation <sup>a</sup> | Full name                                             | Location | Website                                                                                           |
|-----|---------------------------|-------------------------------------------------------|----------|---------------------------------------------------------------------------------------------------|
| 1   | WFSJ                      | Weifang Sanjia Chemical Co.                           | China    | <a href="http://www.wfsanjia.com/Product/EYHG/">http://www.wfsanjia.com/Product/EYHG/</a>         |
| 2   | TCTS                      | Tangshan Caofeidian Taiheng Shengda New Materials Co. | China    | <a href="http://www.thsdhn.com/">http://www.thsdhn.com/</a>                                       |
| 3   | BJDK                      | Beijing DK Nano Technology Co.                        | China    | <a href="http://www.nanoinglobal.com/">http://www.nanoinglobal.com/</a>                           |
| 4   | XCJR                      | Xuancheng Jing Rui New Material Co.                   | China    | <a href="http://www.jingruinano.com/">http://www.jingruinano.com/</a>                             |
| 5   | SGCT                      | Shouguang Chang Tai Micro-Nano Chemical Plant         | China    | <a href="http://www.sgchangtai.cn/">http://www.sgchangtai.cn/</a>                                 |
| 6   | SHMK                      | Shanghai Maikun Chemical Co.                          | China    | <a href="https://shmaikun.1688.com/">https://shmaikun.1688.com/</a>                               |
| 7   | THSL                      | Tonghua Shuanglong Chemical Co.                       | China    | <a href="http://www.thdoubledragon.com/">http://www.thdoubledragon.com/</a>                       |
| 8   | Wacker                    | Wacker Chemie AG                                      | Germany  | <a href="https://www.wacker.com/">https://www.wacker.com/</a>                                     |
| 9   | Degussa                   | Evonik Industries AG                                  | Germany  | <a href="http://corporate.evonik.cn/">http://corporate.evonik.cn/</a>                             |
| 10  | Aladdin                   | Aladdin Co.                                           | China    | <a href="http://www.aladdin-e.com/">http://www.aladdin-e.com/</a>                                 |
| 11  | NCPS                      | NanoComposix                                          | USA      | <a href="https://nanocomposix.com/">https://nanocomposix.com/</a>                                 |
| 12  | TJK                       | Tianjin Kemiou Chemical Reagent Co.                   | China    | <a href="http://www.chemreagent.com/">http://www.chemreagent.com/</a>                             |
| 13  | TJZY                      | Tianjin Zhiyuan Chemical Reagent Co.                  | China    | <a href="http://www.zhiyuanhx.cn/">http://www.zhiyuanhx.cn/</a>                                   |
| 14  | WXYT                      | Wuxi Yatai United Chemical Co.                        | China    | not available                                                                                     |
| 15  | TJDM                      | Tianjin Damao Chemical Reagent Factory                | China    | <a href="http://www.dmreagent.com/">http://www.dmreagent.com/</a>                                 |
| 16  | FYTF                      | Fengyang Tengfei Sand Co.                             | China    | <a href="http://www.fyftsys.com/">http://www.fyftsys.com/</a>                                     |
| 17  | TJFC                      | Tianjin Fuchen Chemical Reagent Co.                   | China    | <a href="http://www.tjfch.com/">http://www.tjfch.com/</a>                                         |
| 18  | TJHX                      | Tianjin Hengxing Chemical Reagent Co.                 | China    | <a href="http://13690197953372.gw.1688.com/?tbpm=3">http://13690197953372.gw.1688.com/?tbpm=3</a> |
| 19  | JLDH                      | Jilin Dahua Diatomite Industrial Co.                  | China    | <a href="http://www.ljdhsm.com/">http://www.ljdhsm.com/</a>                                       |
| 20  | IFM-1                     | Ahlstrom-Munksjö                                      | Sweden   | <a href="http://www.munktell.com">www.munktell.com</a>                                            |
| 21  | IFM-2                     | Pall Corporation                                      | USA      | <a href="https://www.pall.com/">https://www.pall.com/</a>                                         |
| 22  | IFM-3                     | GE Whatman                                            | UK       | <a href="http://www.gelifesciences.com.cn/">http://www.gelifesciences.com.cn/</a>                 |
| 23  | TP-1                      | Liuzhou Liangmianzhen Co.                             | China    | <a href="http://www.lmz.com.cn/">http://www.lmz.com.cn/</a>                                       |
| 24  | TP-2                      | Aekyung Co.                                           | Korea    | <a href="http://www.aekyung.co.kr/KR/main/main.do">http://www.aekyung.co.kr/KR/main/main.do</a>   |
| 25  | TP-3                      | Pororo Co.                                            | Korea    | not available                                                                                     |

|    |      |               |     |                                                                     |
|----|------|---------------|-----|---------------------------------------------------------------------|
| 26 | TP-4 | Cellamiss Co. | USA | not available                                                       |
| 27 | NQC  | MagicGem Co.  | USA | <a href="http://www.magicgem.co.uk/">http://www.magicgem.co.uk/</a> |

---

96 **Supplementary Table 3.** The probability of five potential sources (EP / EF / ES / NQ / ND) of  
 97 SiO<sub>2</sub> NP samples given by the five-class LDA-based classification model.<sup>a</sup>

| Sample | Probability of source |       |       |       |       |
|--------|-----------------------|-------|-------|-------|-------|
|        | EP                    | EF    | ES    | NQ    | ND    |
| EP-1   | 0.657                 | 0.009 | 0.315 | 0.010 | 0.008 |
| EP-2   | 0.750                 | 0.006 | 0.190 | 0.053 | 0.001 |
| EP-3   | 0.772                 | 0.002 | 0.167 | 0.056 | 0.002 |
| EP-4   | 0.353                 | 0.001 | 0.305 | 0.001 | 0.341 |
| EP-5   | 0.771                 | 0.002 | 0.140 | 0.086 | 0.001 |
| EP-6   | 0.749                 | 0.003 | 0.214 | 0.030 | 0.005 |
| EP-7   | 0.781                 | 0.000 | 0.168 | 0.037 | 0.014 |
| EP-8   | 0.772                 | 0.002 | 0.165 | 0.059 | 0.002 |
| EP-9   | 0.778                 | 0.001 | 0.147 | 0.071 | 0.002 |
| EP-10  | 0.776                 | 0.001 | 0.149 | 0.072 | 0.002 |
| EP-11  | 0.726                 | 0.002 | 0.242 | 0.018 | 0.012 |
| EP-12  | 0.787                 | 0.000 | 0.155 | 0.040 | 0.018 |
| EP-13  | 0.778                 | 0.000 | 0.170 | 0.033 | 0.018 |
| EP-14  | 0.775                 | 0.000 | 0.167 | 0.030 | 0.027 |
| EP-15  | 0.664                 | 0.000 | 0.050 | 0.285 | 0.001 |
| EP-16  | 0.717                 | 0.000 | 0.063 | 0.219 | 0.002 |
| EP-17  | 0.786                 | 0.000 | 0.153 | 0.037 | 0.024 |
| EP-18  | 0.788                 | 0.000 | 0.154 | 0.042 | 0.016 |
| EP-19  | 0.758                 | 0.000 | 0.174 | 0.024 | 0.044 |
| EP-20  | 0.688                 | 0.000 | 0.051 | 0.259 | 0.002 |
| EP-21  | 0.799                 | 0.000 | 0.124 | 0.066 | 0.011 |
| EP-22  | 0.775                 | 0.000 | 0.112 | 0.110 | 0.002 |
| EP-23  | 0.499                 | 0.000 | 0.026 | 0.475 | 0.000 |
| EP-24  | 0.445                 | 0.000 | 0.020 | 0.535 | 0.000 |
| EP-25  | 0.516                 | 0.000 | 0.027 | 0.457 | 0.000 |
| EP-26  | 0.655                 | 0.000 | 0.053 | 0.291 | 0.001 |
| EP-27  | 0.681                 | 0.000 | 0.060 | 0.259 | 0.001 |
| EP-28  | 0.543                 | 0.000 | 0.035 | 0.422 | 0.000 |
| EF-1   | 0.033                 | 0.651 | 0.315 | 0.000 | 0.000 |
| EF-2   | 0.026                 | 0.621 | 0.353 | 0.000 | 0.000 |
| EF-3   | 0.116                 | 0.679 | 0.205 | 0.000 | 0.000 |
| EF-4   | 0.159                 | 0.728 | 0.105 | 0.008 | 0.000 |
| EF-5   | 0.083                 | 0.737 | 0.180 | 0.000 | 0.000 |
| EF-6   | 0.069                 | 0.740 | 0.191 | 0.000 | 0.000 |
| EF-7   | 0.629                 | 0.001 | 0.306 | 0.006 | 0.058 |
| EF-8   | 0.051                 | 0.706 | 0.243 | 0.000 | 0.000 |
| EF-9   | 0.037                 | 0.668 | 0.294 | 0.000 | 0.000 |
| EF-10  | 0.549                 | 0.052 | 0.390 | 0.005 | 0.004 |
| EF-11  | 0.045                 | 0.689 | 0.266 | 0.000 | 0.000 |
| EF-12  | 0.056                 | 0.723 | 0.220 | 0.000 | 0.000 |
| EF-13  | 0.172                 | 0.629 | 0.198 | 0.001 | 0.000 |
| EF-14  | 0.767                 | 0.000 | 0.186 | 0.027 | 0.019 |
| EF-15  | 0.030                 | 0.636 | 0.334 | 0.000 | 0.000 |
| ES-1   | 0.771                 | 0.002 | 0.167 | 0.058 | 0.002 |
| ES-2   | 0.783                 | 0.000 | 0.114 | 0.100 | 0.003 |

|        |       |       |       |       |       |
|--------|-------|-------|-------|-------|-------|
| ES-3   | 0.716 | 0.000 | 0.070 | 0.212 | 0.001 |
| ES-4   | 0.109 | 0.080 | 0.518 | 0.000 | 0.293 |
| ES-5   | 0.562 | 0.012 | 0.401 | 0.004 | 0.021 |
| ES-6   | 0.225 | 0.080 | 0.591 | 0.000 | 0.104 |
| ES-7   | 0.621 | 0.011 | 0.350 | 0.007 | 0.011 |
| NQ-1   | 0.350 | 0.000 | 0.006 | 0.644 | 0.000 |
| NQ-2   | 0.372 | 0.000 | 0.009 | 0.619 | 0.000 |
| NQ-3   | 0.354 | 0.000 | 0.005 | 0.640 | 0.000 |
| NQ-4   | 0.371 | 0.000 | 0.011 | 0.618 | 0.000 |
| NQ-5   | 0.374 | 0.000 | 0.010 | 0.616 | 0.000 |
| NQ-6   | 0.354 | 0.000 | 0.007 | 0.639 | 0.000 |
| NQ-7   | 0.366 | 0.000 | 0.010 | 0.624 | 0.000 |
| NQ-8   | 0.365 | 0.000 | 0.010 | 0.625 | 0.000 |
| NQ-9   | 0.398 | 0.000 | 0.016 | 0.586 | 0.000 |
| NQ-10  | 0.363 | 0.000 | 0.011 | 0.626 | 0.000 |
| NQ-11  | 0.358 | 0.000 | 0.009 | 0.633 | 0.000 |
| NQ-12* | 0.364 | 0.000 | 0.005 | 0.631 | 0.000 |
| NQ-13* | 0.359 | 0.000 | 0.006 | 0.636 | 0.000 |
| NQ-14* | 0.357 | 0.000 | 0.005 | 0.638 | 0.000 |
| NQ-15* | 0.358 | 0.000 | 0.007 | 0.635 | 0.000 |
| NQ-16* | 0.364 | 0.000 | 0.008 | 0.629 | 0.000 |
| NQ-17* | 0.356 | 0.000 | 0.006 | 0.638 | 0.000 |
| NQ-18* | 0.349 | 0.000 | 0.008 | 0.643 | 0.000 |
| NQ-19* | 0.334 | 0.000 | 0.009 | 0.657 | 0.000 |
| NQ-20* | 0.356 | 0.000 | 0.011 | 0.633 | 0.000 |
| ND-1   | 0.481 | 0.000 | 0.161 | 0.004 | 0.353 |
| ND-2   | 0.646 | 0.000 | 0.164 | 0.011 | 0.179 |
| ND-3   | 0.791 | 0.000 | 0.081 | 0.112 | 0.015 |
| ND-4   | 0.782 | 0.000 | 0.079 | 0.130 | 0.010 |
| ND-5*  | 0.066 | 0.000 | 0.161 | 0.000 | 0.773 |
| ND-6*  | 0.070 | 0.000 | 0.154 | 0.000 | 0.776 |
| ND-7*  | 0.064 | 0.000 | 0.167 | 0.000 | 0.770 |
| ND-8*  | 0.047 | 0.000 | 0.216 | 0.000 | 0.738 |
| ND-9*  | 0.055 | 0.000 | 0.192 | 0.000 | 0.753 |
| ND-10* | 0.281 | 0.000 | 0.095 | 0.002 | 0.623 |
| ND-11* | 0.121 | 0.000 | 0.096 | 0.000 | 0.782 |
| ND-12* | 0.088 | 0.000 | 0.112 | 0.000 | 0.799 |
| ND-13* | 0.033 | 0.000 | 0.276 | 0.000 | 0.692 |
| ND-14* | 0.315 | 0.000 | 0.042 | 0.008 | 0.636 |
| ND-15* | 0.122 | 0.000 | 0.073 | 0.000 | 0.805 |
| ND-16* | 0.045 | 0.000 | 0.221 | 0.000 | 0.734 |
| ND-17* | 0.140 | 0.000 | 0.075 | 0.000 | 0.785 |
| ND-18* | 0.083 | 0.000 | 0.123 | 0.000 | 0.794 |
| ND-19* | 0.064 | 0.000 | 0.164 | 0.000 | 0.772 |
| ND-20* | 0.605 | 0.000 | 0.055 | 0.044 | 0.296 |

98 <sup>a</sup> The pseudo-samples constructed based on the literature data of  $\delta^{30}\text{Si}$  and  $\delta^{18}\text{O}$  are labeled by  
99 asterisks.

100

101 **Supplementary Table 4.** The probability of four potential sources (EP+ES / EF / NQ / ND) of  
 102 SiO<sub>2</sub> NP samples given by the four-class LDA-based classification model.<sup>a</sup>

| Sample | Probability of source |       |       |       |
|--------|-----------------------|-------|-------|-------|
|        | EP + ES               | EF    | NQ    | ND    |
| EP-1   | 0.961                 | 0.010 | 0.024 | 0.005 |
| EP-2   | 0.902                 | 0.008 | 0.089 | 0.001 |
| EP-3   | 0.907                 | 0.002 | 0.089 | 0.002 |
| EP-4   | 0.711                 | 0.001 | 0.002 | 0.286 |
| EP-5   | 0.870                 | 0.002 | 0.127 | 0.001 |
| EP-6   | 0.939                 | 0.003 | 0.055 | 0.003 |
| EP-7   | 0.930                 | 0.000 | 0.059 | 0.011 |
| EP-8   | 0.903                 | 0.002 | 0.093 | 0.002 |
| EP-9   | 0.891                 | 0.001 | 0.106 | 0.002 |
| EP-10  | 0.888                 | 0.002 | 0.109 | 0.001 |
| EP-11  | 0.954                 | 0.002 | 0.035 | 0.008 |
| EP-12  | 0.924                 | 0.000 | 0.062 | 0.014 |
| EP-13  | 0.932                 | 0.000 | 0.054 | 0.014 |
| EP-14  | 0.929                 | 0.000 | 0.049 | 0.021 |
| EP-15  | 0.691                 | 0.000 | 0.308 | 0.001 |
| EP-16  | 0.751                 | 0.000 | 0.247 | 0.002 |
| EP-17  | 0.923                 | 0.000 | 0.058 | 0.019 |
| EP-18  | 0.923                 | 0.000 | 0.064 | 0.012 |
| EP-19  | 0.926                 | 0.000 | 0.039 | 0.034 |
| EP-20  | 0.718                 | 0.000 | 0.280 | 0.002 |
| EP-21  | 0.898                 | 0.000 | 0.093 | 0.009 |
| EP-22  | 0.850                 | 0.001 | 0.148 | 0.002 |
| EP-23  | 0.518                 | 0.000 | 0.482 | 0.000 |
| EP-24  | 0.460                 | 0.000 | 0.540 | 0.000 |
| EP-25  | 0.536                 | 0.000 | 0.464 | 0.000 |
| EP-26  | 0.680                 | 0.000 | 0.319 | 0.000 |
| EP-27  | 0.709                 | 0.000 | 0.290 | 0.001 |
| EP-28  | 0.560                 | 0.000 | 0.440 | 0.000 |
| EF-1   | 0.124                 | 0.875 | 0.000 | 0.000 |
| EF-2   | 0.115                 | 0.885 | 0.000 | 0.000 |
| EF-3   | 0.258                 | 0.740 | 0.002 | 0.000 |
| EF-4   | 0.234                 | 0.746 | 0.020 | 0.000 |
| EF-5   | 0.184                 | 0.814 | 0.001 | 0.000 |
| EF-6   | 0.163                 | 0.836 | 0.001 | 0.000 |
| EF-7   | 0.944                 | 0.001 | 0.013 | 0.042 |
| EF-8   | 0.142                 | 0.857 | 0.001 | 0.000 |
| EF-9   | 0.128                 | 0.871 | 0.000 | 0.000 |
| EF-10  | 0.929                 | 0.053 | 0.016 | 0.003 |
| EF-11  | 0.137                 | 0.862 | 0.001 | 0.000 |
| EF-12  | 0.147                 | 0.852 | 0.001 | 0.000 |
| EF-13  | 0.326                 | 0.669 | 0.006 | 0.000 |
| EF-14  | 0.939                 | 0.000 | 0.047 | 0.014 |
| EF-15  | 0.120                 | 0.880 | 0.000 | 0.000 |
| ES-1   | 0.904                 | 0.002 | 0.092 | 0.002 |
| ES-2   | 0.862                 | 0.000 | 0.135 | 0.002 |

|        |       |       |       |       |
|--------|-------|-------|-------|-------|
| ES-3   | 0.752 | 0.000 | 0.247 | 0.001 |
| ES-4   | 0.588 | 0.084 | 0.000 | 0.328 |
| ES-5   | 0.963 | 0.012 | 0.011 | 0.014 |
| ES-6   | 0.825 | 0.082 | 0.001 | 0.092 |
| ES-7   | 0.964 | 0.011 | 0.018 | 0.007 |
| NQ-1   | 0.327 | 0.000 | 0.673 | 0.000 |
| NQ-2   | 0.372 | 0.000 | 0.628 | 0.000 |
| NQ-3   | 0.327 | 0.000 | 0.673 | 0.000 |
| NQ-4   | 0.373 | 0.000 | 0.626 | 0.000 |
| NQ-5   | 0.376 | 0.000 | 0.624 | 0.000 |
| NQ-6   | 0.338 | 0.000 | 0.661 | 0.000 |
| NQ-7   | 0.366 | 0.000 | 0.634 | 0.000 |
| NQ-8   | 0.364 | 0.000 | 0.636 | 0.000 |
| NQ-9   | 0.407 | 0.000 | 0.593 | 0.000 |
| NQ-10  | 0.363 | 0.000 | 0.637 | 0.000 |
| NQ-11  | 0.352 | 0.000 | 0.647 | 0.000 |
| NQ-12* | 0.345 | 0.000 | 0.655 | 0.000 |
| NQ-13* | 0.328 | 0.000 | 0.672 | 0.000 |
| NQ-14* | 0.327 | 0.000 | 0.673 | 0.000 |
| NQ-15* | 0.349 | 0.000 | 0.651 | 0.000 |
| NQ-16* | 0.355 | 0.000 | 0.644 | 0.000 |
| NQ-17* | 0.328 | 0.000 | 0.672 | 0.000 |
| NQ-18* | 0.319 | 0.000 | 0.681 | 0.000 |
| NQ-19* | 0.350 | 0.000 | 0.650 | 0.000 |
| NQ-20* | 0.349 | 0.000 | 0.651 | 0.000 |
| ND-1   | 0.687 | 0.000 | 0.009 | 0.304 |
| ND-2   | 0.831 | 0.000 | 0.020 | 0.149 |
| ND-3   | 0.850 | 0.000 | 0.135 | 0.014 |
| ND-4   | 0.837 | 0.000 | 0.155 | 0.009 |
| ND-5*  | 0.238 | 0.000 | 0.001 | 0.761 |
| ND-6*  | 0.217 | 0.000 | 0.001 | 0.783 |
| ND-7*  | 0.126 | 0.000 | 0.000 | 0.874 |
| ND-8*  | 0.253 | 0.000 | 0.002 | 0.746 |
| ND-9*  | 0.157 | 0.000 | 0.000 | 0.843 |
| ND-10* | 0.144 | 0.000 | 0.000 | 0.856 |
| ND-11* | 0.122 | 0.000 | 0.000 | 0.878 |
| ND-12* | 0.121 | 0.000 | 0.000 | 0.879 |
| ND-13* | 0.193 | 0.000 | 0.000 | 0.807 |
| ND-14* | 0.205 | 0.000 | 0.000 | 0.795 |
| ND-15* | 0.216 | 0.000 | 0.001 | 0.783 |
| ND-16* | 0.260 | 0.000 | 0.003 | 0.737 |
| ND-17* | 0.155 | 0.000 | 0.000 | 0.845 |
| ND-18* | 0.109 | 0.000 | 0.000 | 0.891 |
| ND-19* | 0.159 | 0.000 | 0.000 | 0.841 |
| ND-20* | 0.111 | 0.000 | 0.000 | 0.889 |

103 <sup>a</sup> The pseudo-samples constructed based on the literature data of  $\delta^{30}\text{Si}$  and  $\delta^{18}\text{O}$  are labeled by  
104 asterisks.

105

106

107 **Supplementary Table 5.** The probability of three potential sources (EP+ES+EF / NQ / ND) of  
 108 SiO<sub>2</sub> NP samples given by the three-class LDA-based classification model.<sup>a</sup>

| Sample | Probability of source |       |       |
|--------|-----------------------|-------|-------|
|        | EP + EF + ES          | NQ    | ND    |
| EP-1   | 0.963                 | 0.026 | 0.011 |
| EP-2   | 0.902                 | 0.096 | 0.002 |
| EP-3   | 0.905                 | 0.092 | 0.003 |
| EP-4   | 0.625                 | 0.002 | 0.373 |
| EP-5   | 0.868                 | 0.131 | 0.002 |
| EP-6   | 0.938                 | 0.056 | 0.006 |
| EP-7   | 0.928                 | 0.057 | 0.015 |
| EP-8   | 0.901                 | 0.096 | 0.003 |
| EP-9   | 0.889                 | 0.108 | 0.003 |
| EP-10  | 0.886                 | 0.112 | 0.002 |
| EP-11  | 0.950                 | 0.036 | 0.014 |
| EP-12  | 0.924                 | 0.059 | 0.017 |
| EP-13  | 0.930                 | 0.052 | 0.018 |
| EP-14  | 0.927                 | 0.047 | 0.026 |
| EP-15  | 0.695                 | 0.304 | 0.001 |
| EP-16  | 0.757                 | 0.241 | 0.002 |
| EP-17  | 0.923                 | 0.055 | 0.022 |
| EP-18  | 0.923                 | 0.062 | 0.016 |
| EP-19  | 0.922                 | 0.037 | 0.041 |
| EP-20  | 0.727                 | 0.272 | 0.002 |
| EP-21  | 0.901                 | 0.089 | 0.011 |
| EP-22  | 0.850                 | 0.148 | 0.002 |
| EP-23  | 0.516                 | 0.484 | 0.000 |
| EP-24  | 0.457                 | 0.543 | 0.000 |
| EP-25  | 0.535                 | 0.465 | 0.000 |
| EP-26  | 0.682                 | 0.318 | 0.001 |
| EP-27  | 0.711                 | 0.289 | 0.001 |
| EP-28  | 0.559                 | 0.441 | 0.000 |
| EF-1   | 0.990                 | 0.010 | 0.000 |
| EF-2   | 0.992                 | 0.008 | 0.000 |
| EF-3   | 0.987                 | 0.011 | 0.003 |
| EF-4   | 0.883                 | 0.117 | 0.000 |
| EF-5   | 0.988                 | 0.011 | 0.001 |
| EF-6   | 0.990                 | 0.009 | 0.001 |
| EF-7   | 0.920                 | 0.013 | 0.067 |
| EF-8   | 0.980                 | 0.020 | 0.000 |
| EF-9   | 0.993                 | 0.006 | 0.000 |
| EF-10  | 0.973                 | 0.019 | 0.008 |
| EF-11  | 0.974                 | 0.026 | 0.000 |
| EF-12  | 0.986                 | 0.014 | 0.000 |
| EF-13  | 0.975                 | 0.024 | 0.001 |
| EF-14  | 0.935                 | 0.045 | 0.020 |
| EF-15  | 0.990                 | 0.010 | 0.000 |
| ES-1   | 0.902                 | 0.095 | 0.003 |
| ES-2   | 0.863                 | 0.133 | 0.003 |



|        |       |       |       |
|--------|-------|-------|-------|
| ES-3   | 0.754 | 0.245 | 0.001 |
| ES-4   | 0.439 | 0.000 | 0.561 |
| ES-5   | 0.956 | 0.011 | 0.033 |
| ES-6   | 0.751 | 0.001 | 0.249 |
| ES-7   | 0.964 | 0.019 | 0.017 |
| NQ-1   | 0.303 | 0.697 | 0.000 |
| NQ-2   | 0.340 | 0.660 | 0.000 |
| NQ-3   | 0.290 | 0.710 | 0.000 |
| NQ-4   | 0.358 | 0.642 | 0.000 |
| NQ-5   | 0.354 | 0.646 | 0.000 |
| NQ-6   | 0.309 | 0.691 | 0.000 |
| NQ-7   | 0.347 | 0.653 | 0.000 |
| NQ-8   | 0.348 | 0.652 | 0.000 |
| NQ-9   | 0.406 | 0.594 | 0.000 |
| NQ-10  | 0.358 | 0.642 | 0.000 |
| NQ-11  | 0.335 | 0.665 | 0.000 |
| NQ-12* | 0.296 | 0.704 | 0.000 |
| NQ-13* | 0.315 | 0.685 | 0.000 |
| NQ-14* | 0.320 | 0.680 | 0.000 |
| NQ-15* | 0.298 | 0.702 | 0.000 |
| NQ-16* | 0.361 | 0.639 | 0.000 |
| NQ-17* | 0.271 | 0.729 | 0.000 |
| NQ-18* | 0.335 | 0.665 | 0.000 |
| NQ-19* | 0.356 | 0.644 | 0.000 |
| NQ-20* | 0.342 | 0.658 | 0.000 |
| ND-1   | 0.681 | 0.008 | 0.311 |
| ND-2   | 0.831 | 0.018 | 0.151 |
| ND-3   | 0.861 | 0.126 | 0.013 |
| ND-4   | 0.846 | 0.146 | 0.008 |
| ND-5*  | 0.179 | 0.001 | 0.820 |
| ND-6*  | 0.141 | 0.000 | 0.859 |
| ND-7*  | 0.075 | 0.000 | 0.925 |
| ND-8*  | 0.201 | 0.001 | 0.798 |
| ND-9*  | 0.079 | 0.000 | 0.921 |
| ND-10* | 0.084 | 0.000 | 0.916 |
| ND-11* | 0.077 | 0.000 | 0.923 |
| ND-12* | 0.081 | 0.000 | 0.919 |
| ND-13* | 0.127 | 0.000 | 0.873 |
| ND-14* | 0.153 | 0.000 | 0.847 |
| ND-15* | 0.140 | 0.000 | 0.860 |
| ND-16* | 0.204 | 0.002 | 0.794 |
| ND-17* | 0.094 | 0.000 | 0.906 |
| ND-18* | 0.098 | 0.000 | 0.902 |
| ND-19* | 0.115 | 0.000 | 0.885 |
| ND-20* | 0.092 | 0.000 | 0.908 |

109 <sup>a</sup> The pseudo-samples constructed based on the literature data of  $\delta^{30}\text{Si}$  and  $\delta^{18}\text{O}$  are labeled by  
110 asterisks.

111

112 **Supplementary Table 6.** Source discrimination results of SiO<sub>2</sub> NPs of known sources into four  
 113 classes by the machine learning model.

| Sample               | Total | Source identified <sup>a</sup>     |    |                 |    | Accuracy |
|----------------------|-------|------------------------------------|----|-----------------|----|----------|
|                      |       | EP + ES                            | EF | NQ              | ND |          |
| SiO <sub>2</sub> NPs | 90    | Number of correct: 85 <sup>b</sup> |    |                 |    | 94.4%    |
| └ Engineered NPs     | 50    | 49 <sup>c</sup>                    |    | 1 <sup>d</sup>  |    | 98.0%    |
| └└ EP                | 28    | 27                                 | 0  | 1               | 0  | 96.4%    |
| └└ ES                | 7     | 7                                  | 0  | 0               | 0  | 100.0%   |
| └└ EF                | 15    | 3                                  | 12 | 0               | 0  | 80.0%    |
| └ Natural NPs        | 40    | 4 <sup>c</sup>                     |    | 36 <sup>d</sup> |    | 90.0%    |
| └└ NQ                | 20    | 0                                  | 0  | 20              | 0  | 100%     |
| └└ ND                | 20    | 4                                  | 0  | 0               | 16 | 80.0%    |

114 <sup>a</sup> The probability values for candidate sources are given in Supplementary Table 4, and the  
 115 statistics in this table was based on the most probable source. Other conditions are the same as  
 116 in Table 1 in the paper.

117 <sup>b</sup> The “number of correct” means the number of samples with correct discrimination result  
 118 between engineered and natural SiO<sub>2</sub> NP.

119 <sup>c</sup> The total number of engineered SiO<sub>2</sub> NPs identified (EP + EF + ES).

120 <sup>d</sup> The total number of natural SiO<sub>2</sub> NPs identified (NQ + ND).

121

122 **Supplementary Table 7.** Source discrimination results of SiO<sub>2</sub> NPs of known sources into three  
 123 classes by the machine learning model.

| Sample               | Total | Source identified <sup>a</sup>     |                 |    | Accuracy |
|----------------------|-------|------------------------------------|-----------------|----|----------|
|                      |       | EP + EF + ES                       | NQ              | ND |          |
| SiO <sub>2</sub> NPs | 90    | Number of correct: 84 <sup>b</sup> |                 |    | 93.3%    |
| └ Engineered NPs     | 50    | 48 <sup>c</sup>                    | 2 <sup>d</sup>  |    | 96.0%    |
| └└ EP                | 28    | 27                                 | 1               | 0  | 96.4%    |
| └└ EF                | 15    | 15                                 | 0               | 0  | 100.0%   |
| └└ ES                | 7     | 6                                  | 0               | 1  | 85.7%    |
| └ Natural NPs        | 40    | 4 <sup>c</sup>                     | 36 <sup>d</sup> |    | 90.0%    |
| └└ NQ                | 20    | 0                                  | 20              | 0  | 100.0%   |
| └└ ND                | 20    | 4                                  | 0               | 16 | 80.0%    |

124 <sup>a</sup> The probability values for candidate sources are given in Supplementary Table 5, and the  
 125 statistics in this table was based on the most probable source. Other conditions are the same as  
 126 in Table 1 in the paper.

127 <sup>b</sup> The “number of correct” means the number of samples with correct discrimination result  
 128 between engineered and natural SiO<sub>2</sub> NP.

129 <sup>c</sup> The total number of engineered SiO<sub>2</sub> NPs identified (EP + EF + ES).

130 <sup>d</sup> The total number of natural SiO<sub>2</sub> NPs identified (NQ + ND).

131

132 **Supplementary Table 8.** Raw materials and chemical reactions in industrial synthesis of engineered SiO<sub>2</sub> NPs (see Fig. 3 in the paper).

| No. <sup>a</sup> | Raw material                                   | Equation                                                                                                                                |
|------------------|------------------------------------------------|-----------------------------------------------------------------------------------------------------------------------------------------|
| 1, 2             | silica or diatomite, powdered carbon, chlorine | $\text{SiO}_2 + 2\text{C} + 2\text{Cl}_2 \xrightarrow{\text{high temperature}} \text{SiCl}_4 + 2\text{CO}$                              |
| 3                | silica, coke, steel scrap                      | $\text{SiO}_2 + \text{C} + \text{Fe} \xrightarrow{\text{high temperature}} \text{Fe}_x\text{Si}_y + \text{CO}$                          |
| 4                | silica, coke                                   | $\text{SiO}_2 + 2\text{C} \xrightarrow{\text{high temperature}} \text{Si} + 2\text{CO}$                                                 |
| 5                | silica, sodium hydroxide                       | $\text{SiO}_2 + 2\text{NaOH} \xrightarrow{\text{high temperature}} \text{Na}_2\text{SiO}_3 + \text{H}_2\text{O}$                        |
| 6                | ferrosilicon, chlorine                         | $\text{Fe}_x\text{Si}_y + \text{Cl}_2 \xrightarrow{\text{high temperature}} \text{SiCl}_4 + \text{Fe}$                                  |
| 7                | industrial silicon, chlorine                   | $\text{Si} + \text{HCl} \xrightarrow{\Delta, \text{catalyst}} \text{SiCl}_4 + \text{H}_2$                                               |
| 8                | industrial silicon, alcohol                    | $\text{Si} + \text{C}_2\text{H}_5\text{OH} \xrightarrow{\Delta, \text{catalyst}} \text{Si}(\text{OC}_2\text{H}_5)_4 + 2\text{H}_2$      |
| 9                | silicon tetrachloride, alcohol                 | $\text{SiCl}_4 + 4\text{C}_2\text{H}_5\text{OH} \xrightarrow{\Delta, \text{catalyst}} \text{Si}(\text{OC}_2\text{H}_5)_4 + 4\text{HCl}$ |
| 10               | silicon tetrachloride, hydrogen, oxygen        | $2\text{H}_2 + \text{O}_2 + \text{SiCl}_4 \xrightarrow{\text{high temperature}} \text{SiO}_2 + 2\text{H}_2\text{O}$                     |
| 11               | TEOS, alkali                                   | $\text{Si}(\text{OC}_2\text{H}_5)_4 + 2\text{H}_2\text{O} \xrightarrow{\text{catalyst}} \text{SiO}_2 + 4\text{C}_2\text{H}_5\text{OH}$  |
| 12               | sodium silicate, hydrochloric acid             | $\text{Na}_2\text{SiO}_3 + 2\text{HCl} \rightarrow \text{SiO}_2 + \text{H}_2\text{O} + 2\text{NaCl}$                                    |

133 <sup>a</sup> The numbers correspond to those in Fig. 3 in the paper.

134

135 **Supplementary Table 9.** The components of extracts from consumer products.<sup>a</sup>

| TP-1                           | TP-2          | TP-3                           | TP-4          | IFM-1                          | IFM-2         | IFM-3                          | NQC           |                  |       |                  |       |                   |       |    |      |
|--------------------------------|---------------|--------------------------------|---------------|--------------------------------|---------------|--------------------------------|---------------|------------------|-------|------------------|-------|-------------------|-------|----|------|
| Component wt%                  | Component wt% | Component wt%                  | Component wt% | Component wt%                  | Component wt% | Component wt%                  | Component wt% |                  |       |                  |       |                   |       |    |      |
| SiO <sub>2</sub>               | 96.97         | SiO <sub>2</sub>               | 99.81         | SiO <sub>2</sub>               | 99.66         | SiO <sub>2</sub>               | 98.57         | SiO <sub>2</sub> | 98.29 | SiO <sub>2</sub> | 99.71 | SiO <sub>2</sub>  | 97.96 | Si | 97.3 |
| TiO <sub>2</sub>               | 2.79          | MgO                            | 0.078         | Al <sub>2</sub> O <sub>3</sub> | 0.138         | TiO <sub>2</sub>               | 1.11          | F                | 0.490 | ZnO              | 0.151 | Na <sub>2</sub> O | 1.06  | Ag | 2.06 |
| MgO                            | 0.074         | SO <sub>3</sub>                | 0.044         | MgO                            | 0.082         | Al <sub>2</sub> O <sub>3</sub> | 0.104         | MgO              | 0.075 | MgO              | 0.081 | CaO               | 0.35  | Zn | 0.27 |
| Al <sub>2</sub> O <sub>3</sub> | 0.043         | Na <sub>2</sub> O              | 0.020         | Na <sub>2</sub> O              | 0.033         | MgO                            | 0.076         | ZnO              | 0.066 | SO <sub>3</sub>  | 0.012 | MgO               | 0.28  | Ti | 0.17 |
| SO <sub>3</sub>                | 0.039         | Fe <sub>2</sub> O <sub>3</sub> | 0.015         | SO <sub>3</sub>                | 0.031         | Na <sub>2</sub> O              | 0.056         | SO <sub>3</sub>  | 0.021 | CaO              | 0.010 | ZnO               | 0.11  | Mg | 0.12 |

136 <sup>a</sup>The major components of TP and IFM samples were measured by X-ray fluorescence (XRF) and the mass fractions were calculated based on the  
 137 oxide content. The major components of NQC samples were measured by ICP-MS and the mass fractions were calculated based on elemental  
 138 contents. Only the five highest components are shown in this table.

139

140 **Supplementary Table 10.** The probability of five potential sources (EP / EF / ES / NQ / ND)  
141 of SiO<sub>2</sub> NPs in consumer products given by the five-class LDA-based classification model.

| Sample | Probability of source |       |       |       |       |
|--------|-----------------------|-------|-------|-------|-------|
|        | EP                    | EF    | ES    | NQ    | ND    |
| TP-1   | 0.799                 | 0.000 | 0.124 | 0.064 | 0.013 |
| TP-2   | 0.710                 | 0.002 | 0.258 | 0.014 | 0.016 |
| TP-3   | 0.666                 | 0.001 | 0.269 | 0.008 | 0.056 |
| TP-4   | 0.533                 | 0.012 | 0.422 | 0.003 | 0.030 |
| IFM-1  | 0.584                 | 0.000 | 0.045 | 0.371 | 0.000 |
| IFM-2  | 0.525                 | 0.000 | 0.035 | 0.439 | 0.000 |
| IFM-3  | 0.570                 | 0.000 | 0.041 | 0.389 | 0.000 |
| NQC    | 0.403                 | 0.000 | 0.002 | 0.595 | 0.000 |

142

143 **Supplementary Table 11.** The probability of four potential sources (EP+ES / EF / NQ / ND)  
144 of SiO<sub>2</sub> NPs in consumer products given by the four-class LDA-based classification model.

| Sample | Probability of source |       |       |       |
|--------|-----------------------|-------|-------|-------|
|        | EP + ES               | EF    | NQ    | ND    |
| TP-1   | 0.900                 | 0.000 | 0.089 | 0.010 |
| TP-2   | 0.958                 | 0.002 | 0.029 | 0.011 |
| TP-3   | 0.941                 | 0.001 | 0.017 | 0.041 |
| TP-4   | 0.960                 | 0.011 | 0.008 | 0.021 |
| IFM-1  | 0.601                 | 0.001 | 0.399 | 0.000 |
| IFM-2  | 0.540                 | 0.001 | 0.460 | 0.000 |
| IFM-3  | 0.587                 | 0.000 | 0.413 | 0.000 |
| NQC    | 0.341                 | 0.000 | 0.659 | 0.000 |

145

146

147 **Supplementary Table 12.** The probability of three potential sources (EP+ES+EF / NQ / ND)  
148 of SiO<sub>2</sub> NPs in consumer products given by the three-class LDA-based classification model.

| Sample | Probability of source |       |       |
|--------|-----------------------|-------|-------|
|        | EP + EF + ES          | NQ    | ND    |
| TP-1   | 0.903                 | 0.085 | 0.012 |
| TP-2   | 0.952                 | 0.029 | 0.019 |
| TP-3   | 0.923                 | 0.017 | 0.061 |
| TP-4   | 0.944                 | 0.009 | 0.047 |
| IFM-1  | 0.599                 | 0.401 | 0.000 |
| IFM-2  | 0.539                 | 0.461 | 0.000 |
| IFM-3  | 0.585                 | 0.414 | 0.000 |
| NQC    | 0.333                 | 0.667 | 0.000 |

149

150



151 **Supplementary Table 13.** Parameters for Si isotope ratio measurement by MC-ICP-MS.

|                                              |                                                                                        |
|----------------------------------------------|----------------------------------------------------------------------------------------|
| Instrument settings                          |                                                                                        |
| RF power                                     | 1300 W                                                                                 |
| Nebulizer pressure                           | 27.6 psi                                                                               |
| Hot gas (Ar) flow rate                       | 0.25 L min <sup>-1</sup>                                                               |
| Membrane gas flow rate                       | 2.68 L min <sup>-1</sup>                                                               |
| Sample introduction                          | DeSolvation Nebulizer (DSN-100)<br>PFA nebulizer, uptake rate ~70 μL min <sup>-1</sup> |
| Sampler cone (nickel)                        | “experimental” WA cone (Nu Instruments) for dry mode                                   |
| Skimmer cone (nickel)                        | “experimental” WA cone (Nu Instruments) for dry mode                                   |
| Lens settings                                | Optimized for maximum analytical signal intensity                                      |
| Torch                                        | Glass                                                                                  |
| Collector                                    | L4- <sup>28</sup> Si, H1- <sup>29</sup> Si, H6- <sup>30</sup> Si                       |
| Data acquisition parameters                  |                                                                                        |
| Scan type                                    | Static measurements                                                                    |
| Measurement mode                             | Medium-resolution with standard-sample-<br>standard bracketing                         |
| Measurement intensity ( <sup>28</sup> Si)    | 3.6 to 7.5 V                                                                           |
| Blank signal (pH ~2) HCl of <sup>28</sup> Si | 20 to 40 mV                                                                            |
| Magnet delay time                            | 2 s                                                                                    |
| Number of blocks                             | 3 block, 10 cycles                                                                     |
| Integration time                             | 10 s                                                                                   |

152

153 **4. Supplementary Figures**

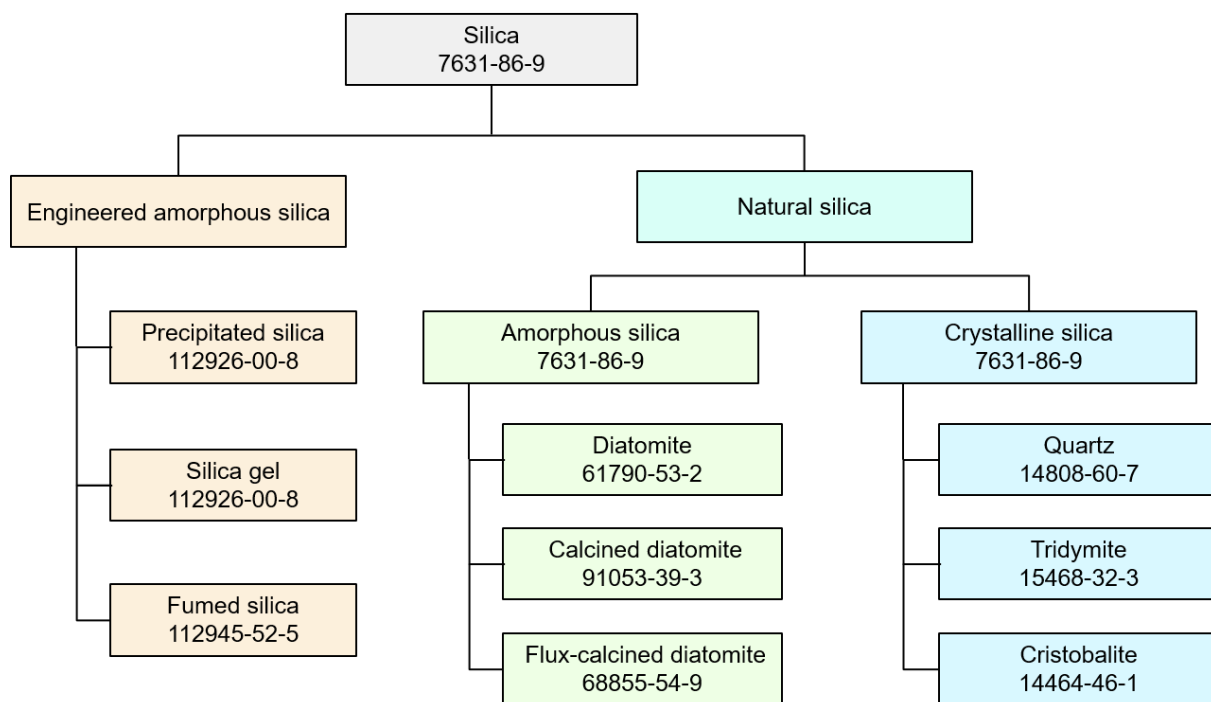

154

155

**Supplementary Figure 1.** CAS numbers of silica in various forms.

156

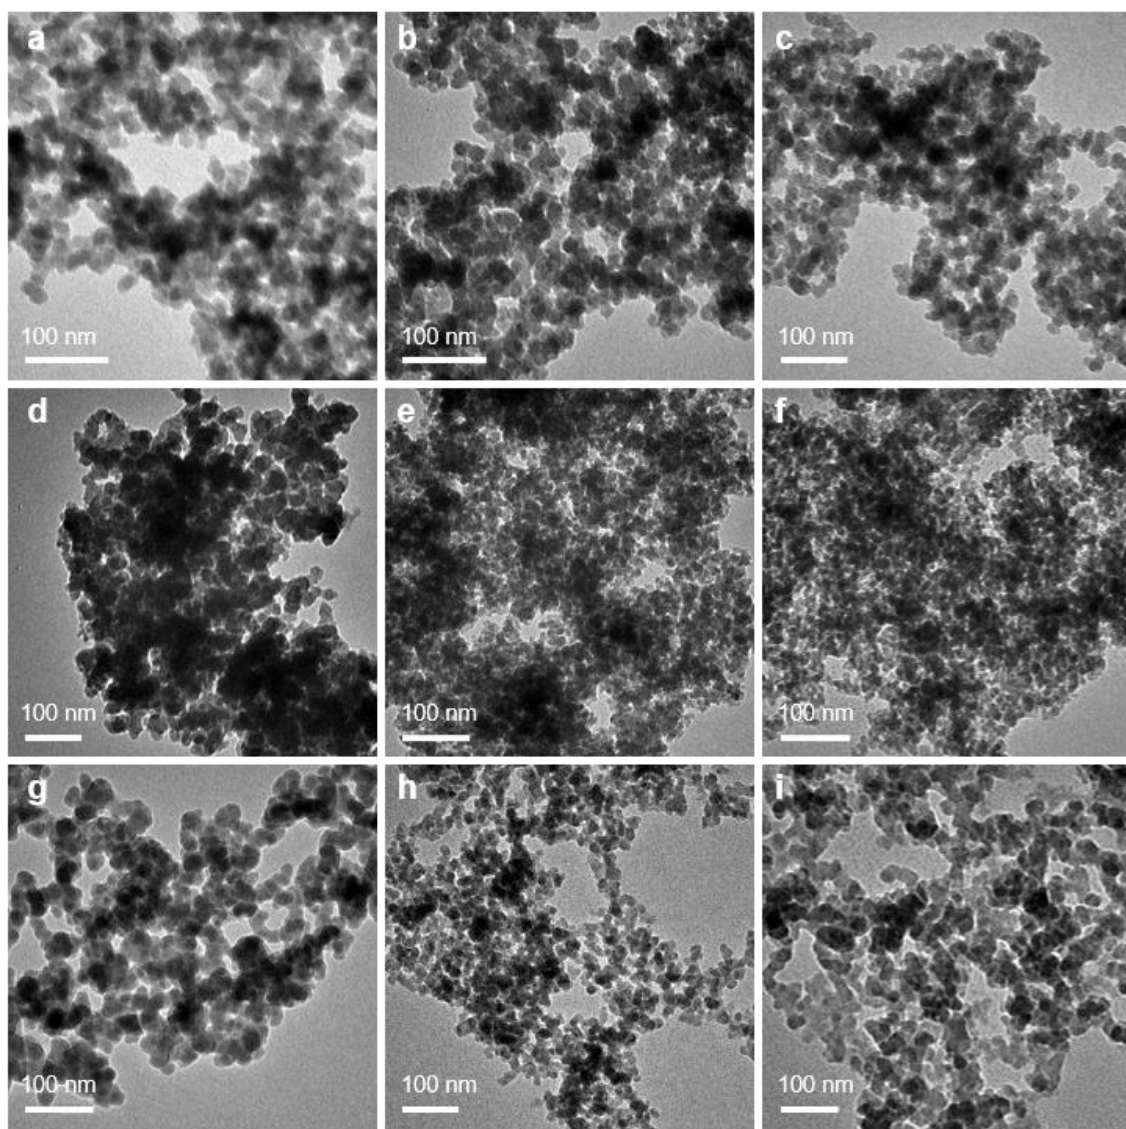

157

158 **Supplementary Figure 2.** TEM measurements of engineered SiO<sub>2</sub> NPs. **a-c**, Precipitated silica  
159 (EP) from BJDK, XCJR, and SGCT, respectively (see Supplementary Table 2 for detailed  
160 information of the suppliers). **d-f**, Sol-gel silica (ES) from SGCT. **g-i**, Fumed silica (EF) from  
161 SGCT, Wacker, and Degussa, respectively. It can be seen that there is no evident difference in  
162 shape or aggregation behavior of engineered SiO<sub>2</sub> NPs among different synthetic methods or  
163 different manufacturers.

164

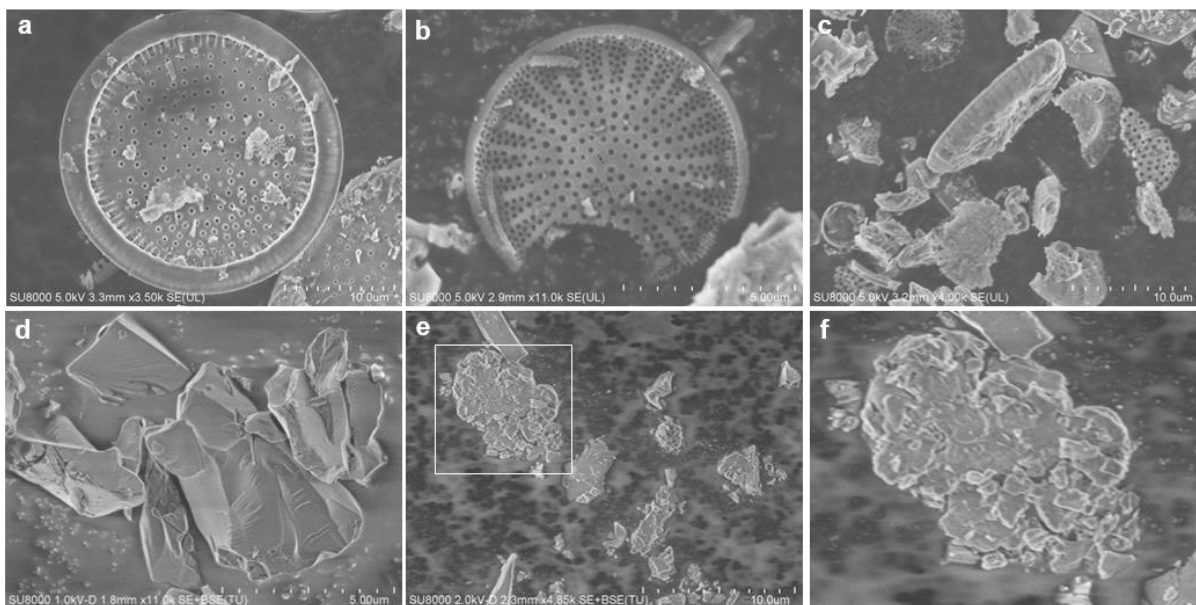

165

166 **Supplementary Figure 3.** SEM measurement showing the different particle morphology in a  
167 sample of natural diatomite (**a-c**) and quartz (**d-f**). **a-c**, Intact (**a**), defected (**b**), and fragmentary  
168 diatomite particles (**c**). **d-e**, Intact (**d**) and fragmentary quartz particles (**e**). **f**, A higher resolution  
169 image showing a quartz particle marked in **e**. Although the intact diatomite and quartz particles  
170 had characteristic appearance, many defected or unfeatured fragmentary particles were also  
171 present in the samples, which might be caused by natural weathering or other physical  
172 processes<sup>14</sup>. Therefore, only microscopy measurements are not able to clarify the sources of  
173 SiO<sub>2</sub> NPs.

174

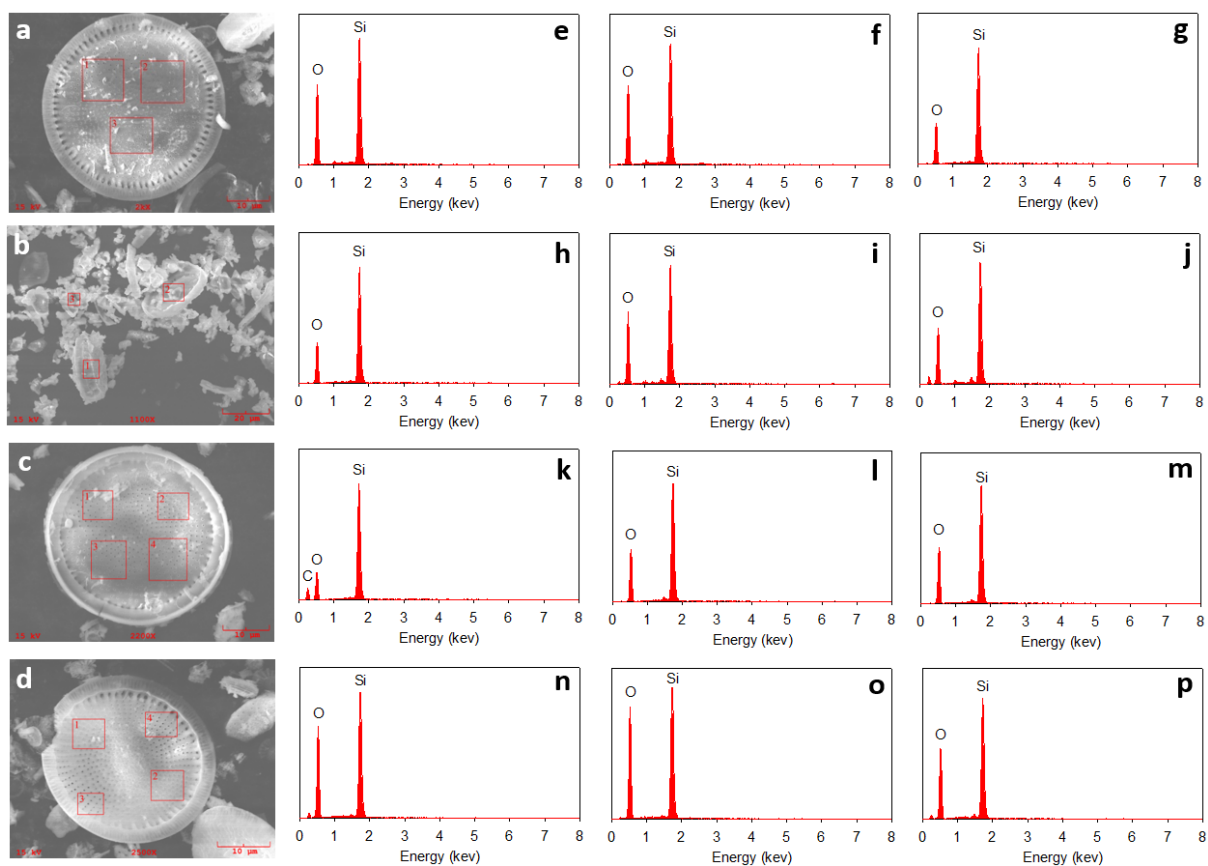

175

176 **Supplementary Figure 4.** SEM and XRD characterization of diatomite. **a-d**, Typical SEM  
 177 images of diatomite obtained from different suppliers (TJFC (**a**), TJHX (**b**), JLDH (**c**), and  
 178 JLDH (**d**); see Supplementary Table 2 for detailed information of the suppliers). **e-p**, The XRD  
 179 patterns obtained at the marked sites in **a**, **b**, **c**, and **d** are shown in **e-g**, **h-j**, **k-m**, and **n-p**,  
 180 respectively. It can be seen that all diatomite samples have a high purity consisting of only Si  
 181 and O, but the  $R_{O/Si}$  at different locations showed large variations.

182

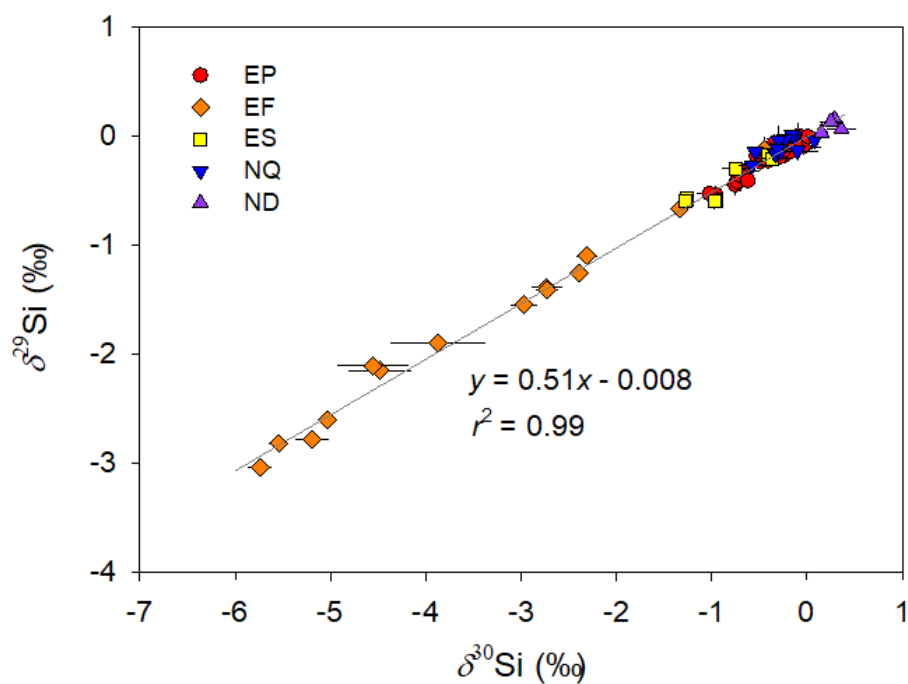

183

184 **Supplementary Figure 5.** Three-isotope plot showing  $\delta^{29}\text{Si}$  versus  $\delta^{30}\text{Si}$  for all  $\text{SiO}_2$  NP  
 185 samples. The solid line represents the theoretical mass-dependent isotope fractionation line.  
 186 The error bars represent 2SD based on multiple measurements ( $n = 2-5$ ). It can be seen that the  
 187 Si isotopic compositions of  $\text{SiO}_2$  NP samples accorded with the mass-dependent isotope  
 188 fractionation.

189

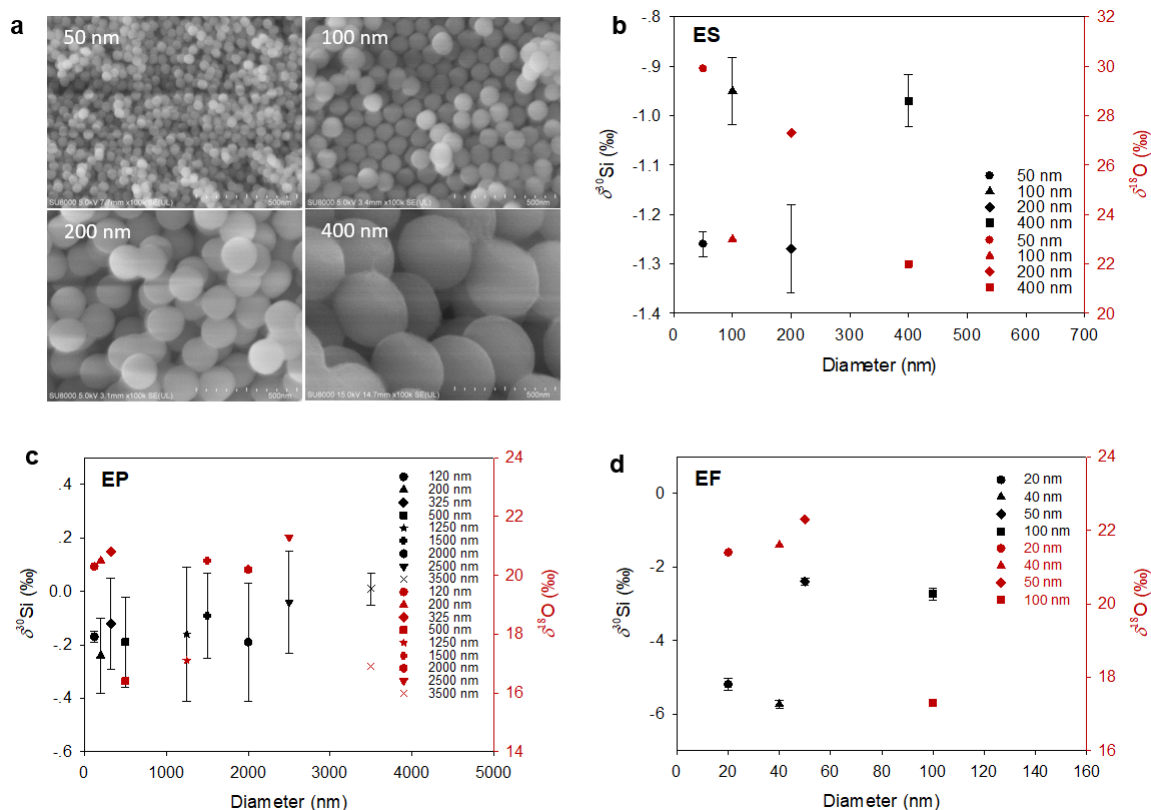

190

191 **Supplementary Figure 6.** Si-O isotopic fingerprints of engineered SiO<sub>2</sub> NPs with different  
 192 particle sizes. **a**, SEM image of SiO<sub>2</sub> NPs from NCPS with particle size ranging from 50 to 400  
 193 nm. **b-d**, Si-O isotopic fingerprints of SiO<sub>2</sub> NPs with different particle sizes synthesized by  
 194 different methods (ES (**b**), EP (**c**), and EF (**d**)). For a certain method, the samples were from a  
 195 same manufacturer. The error bars in **b-d** represent 2SD based on multiple measurements ( $n =$   
 196 2-5). For ES and EP, the  $\delta^{30}\text{Si}$  showed less variations than  $\delta^{18}\text{O}$ ; while for EF, the  $\delta^{30}\text{Si}$  also  
 197 showed a wide variation range. These results were consistent with those in Fig. 2a and 2c. In  
 198 addition, the O in engineered SiO<sub>2</sub> NPs had more complex sources than the Si (Fig. 3), which  
 199 might also result in a wider  $\delta^{18}\text{O}$  range than  $\delta^{30}\text{Si}$ . However, for all synthetic methods, the Si-  
 200 O isotopic fingerprints of engineered SiO<sub>2</sub> NPs displayed no clear trends with their particle size.  
 201

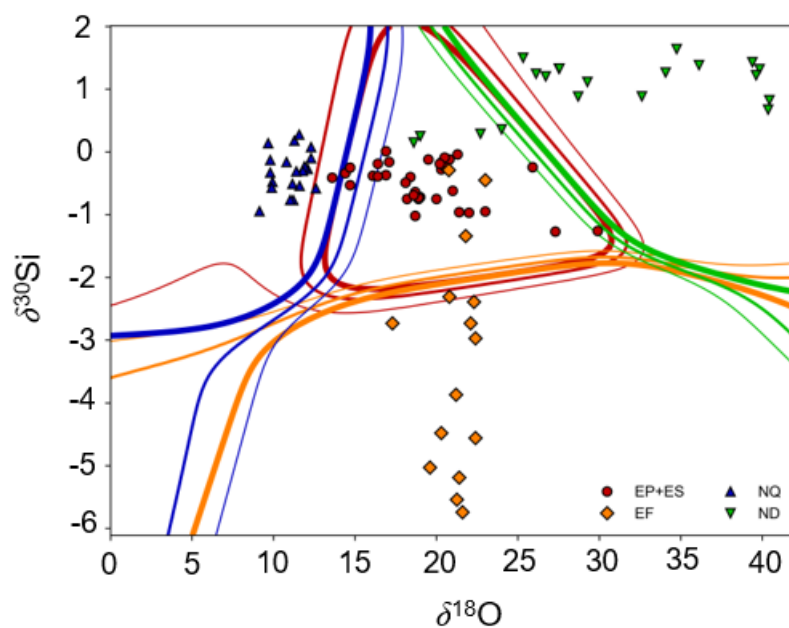

202

203 **Supplementary Figure 7.** Si-O 2D isotopic fingerprints SiO<sub>2</sub> NPs with LDA into four classes  
 204 (ND / NQ / EF / EP+ES). The zones defined by colored contour lines representing virtual  
 205 distribution ranges of different sources given by the linear discriminant analysis (LDA)-based  
 206 classifier. The color and thickness of the contour lines correspond to the respective sources and  
 207 the probabilities of a sample being predicted to be the related class (0.5, 0.4, 0.3 for the thick,  
 208 normal, and the thin one, respectively). Other conditions are the same as in Fig. 2 in the paper.  
 209 The source discrimination results are given in Supplementary Table 4 and 6.

210



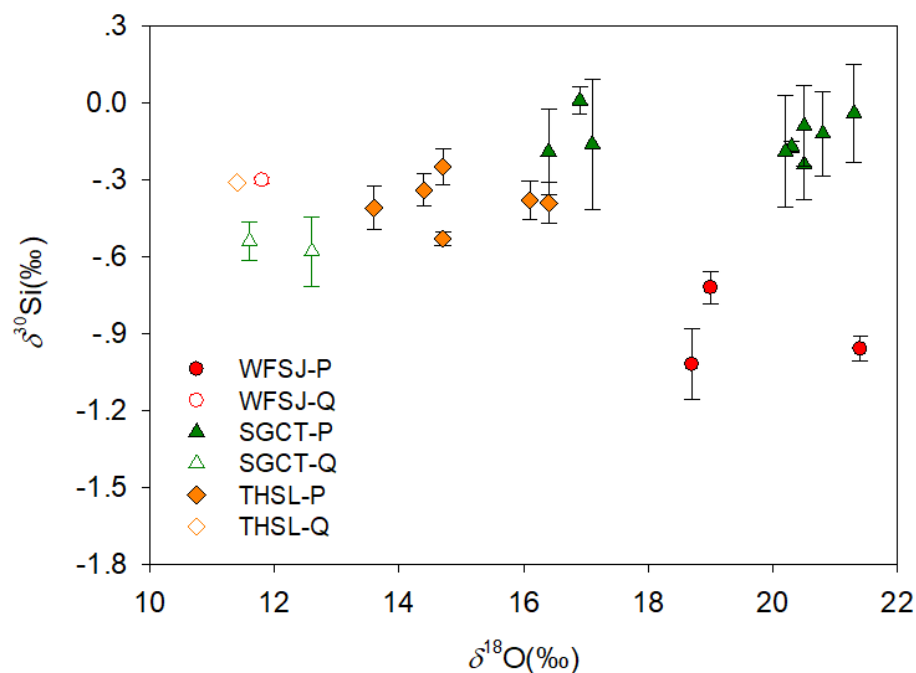

211

212 **Supplementary Figure 8.** Si-O isotopic fingerprints of precipitated SiO<sub>2</sub> NPs (EP) and their  
 213 raw materials (quartz; NQ) from three different manufacturers. The error bars represent 2SD  
 214 based on parallel measurements ( $n = 2-5$ ). The dots in red, orange, and green represent materials  
 215 from WFSJ (EP-1 and NQ-1), SGCT (EP-2 and NQ-2), and THSL (EP-3 and NQ-3),  
 216 respectively, and the solid and hollow dots represent the products (EP) and the corresponding  
 217 raw materials (NQ), respectively. The detailed discussion is given in Supplementary Section  
 218 2.2.

219

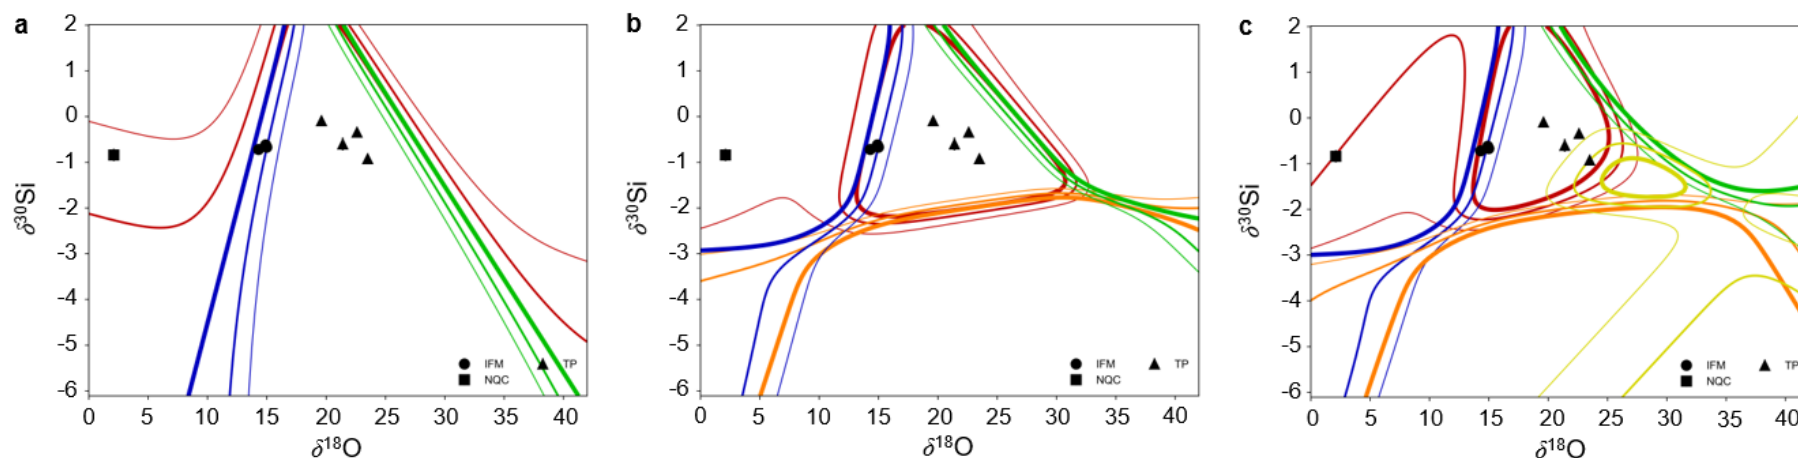

220

221 **Supplementary Figure 9.** Identification of the sources of SiO<sub>2</sub> NPs in consumer products (IFM, TP, and NQC) by Si-O 2D isotopic fingerprints  
 222 and machine learning model. The zones defined by colored contour lines represent virtual distribution ranges of different sources given by the  
 223 three- (a), four- (b), and five-class (c) LDA-based classifiers. The color and thickness of the contour lines correspond to the respective sources (the  
 224 same as in Fig. 2) and the probabilities of a sample being predicted to be the related class (0.5, 0.4, 0.3 for the thick, normal, and the thin one,  
 225 respectively). The probability of the sources of SiO<sub>2</sub> NPs in consumer products are given in Supplementary Table 10-12. From b and c, because  
 226 EP and ES could not be well differentiated, the SiO<sub>2</sub> NPs in TP samples were highly probable to originate from EP or ES (probability 90.0–96.0%  
 227 for EP + ES in four-class LDA; see Supplementary Table 11). This result accorded with the fact that precipitated silica is commonly used as an  
 228 abrasive and thickening agent in toothpastes due to its abrasive nature. For IFM samples, all data points were distributed at the boundary between  
 229 NQ and NP. Thus, the SiO<sub>2</sub> NPs in IFM samples probably originated from EP or NQ (probability 52.5–58.4% for EP and 37.1–43.9% for NQ in  
 230 five-class LDA; see Supplementary Table 10). For the NQC sample, from a-c, the SiO<sub>2</sub> NPs most probably came from NQ (probability >59.5%  
 231 with all three classifiers; see Supplementary Table 10-12), which was consistent with the production description provided by the manufacturer.  
 232

## 233 5. Supplementary References

- 234 1 Barker, P. A. *et al.* A 14,000-year oxygen isotope record from diatom silica in two alpine  
235 lakes on Mt. Kenya. *Science* **292**, 2307-2310 (2001).
- 236 2 Rietti-Shati, M., Shemesh, A. & Karlen, W. A 3000-year climatic record from biogenic  
237 silica oxygen isotopes in an equatorial high-altitude lake. *Science* **281**, 980-982 (1998).
- 238 3 Basile-Doelsch, I., Meunier, J. D. & Parron, C. Another continental pool in the terrestrial  
239 silicon cycle. *Nature* **433**, 399 (2005).
- 240 4 Hu, F. S. & Shemesh, A. A biogenic-silica  $\delta^{18}\text{O}$  record of climatic change during the  
241 last glacial–interglacial transition in southwestern Alaska. *Quatern. Res.* **59**, 379-385  
242 (2003).
- 243 5 Varela, D. E., Pride, C. J. & Brzezinski, M. A. Biological fractionation of silicon  
244 isotopes in Southern Ocean surface waters. *Global Biogeochem. Cy.* **18** (2004).
- 245 6 Douthitt, C. The geochemistry of the stable isotopes of silicon. *Geochim. Cosmochim.*  
246 *Acta* **46**, 1449-1458 (1982).
- 247 7 Reynolds, J. H. & Verhoogen, J. Natural variations in the isotopic constitution of silicon.  
248 *Geochim. Cosmochim. Acta* **3**, 224-234 (1953).
- 249 8 Jun, L. L. New approach to surface seawater palaeotemperatures using  $^{18}\text{O}/^{16}\text{O}$  ratios in  
250 silica of diatom frustules. *Nature* **248**, 40 (1974).
- 251 9 Clayton, R. N., O'Neil, J. R. & Mayeda, T. K. Oxygen isotope exchange between quartz  
252 and water. *J. Geophys. Res.* **77**, 3057-3067 (1972).
- 253 10 Matsuhisa, Y., Goldsmith, J. R. & Clayton, R. N. Oxygen isotopic fractionation in the  
254 system quartz-albite-anorthite-water. *Geochim. Cosmochim. Acta* **43**, 1131-1140 (1979).
- 255 11 De La Rocha, C., Brzezinski, M. A., DeNiro, M. & Shemesh, A. Silicon-isotope  
256 composition of diatoms as an indicator of past oceanic change. *Nature* **395**, 680 (1998).
- 257 12 Leclerc, A. J. & Labeyrie, L. Temperature dependence of the oxygen isotopic  
258 fractionation between diatom silica and water. *Earth Planet. Sci. Lett.* **84**, 69-74 (1987).
- 259 13 Wiederhold, J. G. Metal stable isotope signatures as tracers in environmental  
260 geochemistry. *Environ. Sci. Technol.* **49**, 2606-2624 (2015).
- 261 14 Gaillardet, J., Dupré B., Louvat, P. & Allegre, C. Global silicate weathering and  $\text{CO}_2$   
262 consumption rates deduced from the chemistry of large rivers. *Chem. Geol.* **159**, 3-30  
263 (1999).

264
